# Supplementary material for: Role of pyruvate in maintaining cell viability and energy production under high-glucose conditions
Source: PubMed Central journal article supplement (PMC8460646; doi:10.1038/s41598-021-98082-w), 2021-09-23
Supplement: 41598_2021_98082_MOESM1_ESM.pdf [file 41598_2021_98082_MOESM1_ESM.pdf]

## **Supplementary material**

### **Role of pyruvate in maintaining cell viability and energy production under high-glucose conditions**

Hideji Yako, Naoko Niimi, Ayako Kato, Shizuka Takaku, Yasuaki Tatsumi, Yasumasa Nishito, Koichi Kato, Kazunori Sango

Supporting Information: Tables (4) and Figures (5)

**Table S1**

[Table S1] Metabolome analysis; the levels of metabolites involved in glycolysis, TCA cycle, pentose phosphate pathway and purine synthetic pathway in IMS32 cells at 1 h in the [Glc 5 mM/Pyr (+)], [Glc 5 mM/Pyr (-)], [Glc 15 mM/Pyr (+)] and [Glc 15 mM/Pyr (-)].

ND: not detected.

| Compound                   | Concentration (pmol/10 <sup>6</sup> cells) |                    |                     |                     |
|----------------------------|--------------------------------------------|--------------------|---------------------|---------------------|
|                            | [Glc 5 mM/Pyr (+)]                         | [Glc 5 mM/Pyr (-)] | [Glc 15 mM/Pyr (+)] | [Glc 15 mM/Pyr (-)] |
| Glucose 6-phosphate        | 53                                         | 41                 | 48                  | 46                  |
| Fructose 6-phosphate       | 19                                         | ND                 | 3.6                 | 25                  |
| Fructose 1,6-bisphosphate  | 1,015                                      | 583                | 1,457               | 2,119               |
| Glyceraldehyde 3-phosphate | ND                                         | 19                 | ND                  | 260                 |
| Dihydroxyacetone phosphate | ND                                         | 109                | 47                  | 795                 |
| 3-Phosphoglyceric acid     | 54                                         | 62                 | 68                  | 71                  |
| 2-Phosphoglyceric acid     | 2.1                                        | 3.4                | 3.1                 | 3.0                 |
| Phosphoenolpyruvate        | ND                                         | ND                 | ND                  | ND                  |
| Pyruvic acid               | 1,191                                      | ND                 | 3,151               | 560                 |
| Lactic acid                | 10,962                                     | 14,594             | 26,997              | 18,898              |
| Acetyl CoA                 | 16                                         | 18                 | 4.0                 | 6.4                 |
| Citric acid                | 3,481                                      | 2,594              | 3,696               | 2,277               |
| <i>cis-Aconitic acid</i>   | 35                                         | 9.7                | 24                  | 2.0                 |
| Isocitric acid             | ND                                         | ND                 | ND                  | ND                  |
| 2-Oxoglutaric acid         | 873                                        | 249                | 1,020               | 243                 |
| Succinic acid              | 656                                        | 608                | 666                 | 552                 |
| Fumaric acid               | 349                                        | ND                 | 529                 | ND                  |
| Malic acid                 | 2,545                                      | 545                | 4,163               | 724                 |
| 6-Phosphogluconate         | 6.6                                        | ND                 | ND                  | ND                  |
| Ribulose 5-phosphate       | 0.2                                        | 13                 | 2.1                 | 28                  |
| Ribose 5-phosphate         | 5.0                                        | 5.6                | 4.4                 | 36                  |
| Xylulose 5-phosphate       | ND                                         | ND                 | ND                  | ND                  |
| Sedoheptulose 7-phosphate  | ND                                         | ND                 | ND                  | ND                  |
| Erythrose 4-phosphate      | ND                                         | 161                | ND                  | ND                  |
| Ribose 1-phosphate         | ND                                         | ND                 | ND                  | ND                  |
| ADP-ribose                 | 34                                         | 35                 | 22                  | 23                  |
| PRPP                       | 9.5                                        | 16                 | 16                  | 11                  |
| IMP                        | 51                                         | 36                 | 36                  | 78                  |
| Inosine                    | ND                                         | ND                 | ND                  | ND                  |
| XMP                        | 2.9                                        | 3.3                | ND                  | 1.8                 |
| Adenylosuccinic acid       | 9.2                                        | 8.5                | 13                  | 9.9                 |
| AMP                        | 523                                        | 518                | 441                 | 294                 |
| ADP                        | 1,841                                      | 2,013              | 2,320               | 1,650               |
| ATP                        | 10,636                                     | 11,361             | 12,873              | 10,514              |
| NAD <sup>+</sup>           | 1,729                                      | 1,839              | 1,936               | 1,212               |
| NADH                       | 110                                        | 134                | 183                 | 175                 |
| NADP <sup>+</sup>          | 144                                        | 126                | 130                 | 103                 |
| NADPH                      | 82                                         | 87                 | 121                 | 108                 |

## Table S2

[Table S2] DNA microarray analysis; the relative expression of genes encoding glycolytic enzymes in IMS32 cells at 1 h in the [Glc 5 mM/Pyruvate (+)], [Glc 5 mM/Pyruvate (-)], [Glc 15 mM/Pyruvate (+)] and [Glc 15 mM/Pyruvate (-)].

| ND:           |                                                        | not                    |                        |                         |                         | detected.                                        |
|---------------|--------------------------------------------------------|------------------------|------------------------|-------------------------|-------------------------|--------------------------------------------------|
| Gene          | Protein                                                | 5 mM glucose pyruvate+ | 5 mM glucose pyruvate- | 15 mM glucose pyruvate+ | 15 mM glucose pyruvate- | 15 mM glucose pyruvate- /15 mM glucose pyruvate+ |
| <i>Hk1</i>    | Hexokinase 1                                           | 55.72                  | 53.28                  | 56.08                   | 52.79                   | 0.94                                             |
| <i>Hk2</i>    | Hexokinase 2                                           | 1.08                   | 1.05                   | 1.06                    | 0.95                    | 0.90                                             |
| <i>Hk3</i>    | Hexokinase 3                                           | 0.01                   | 0.02                   | 0.01                    | 0.01                    | 0.80                                             |
| <i>G6pd2</i>  | Glucose-6-phosphate dehydrogenase 2                    | 0.10                   | 0.09                   | 0.10                    | 0.12                    | 1.22                                             |
| <i>Pfkfb1</i> | 6-phosphofructo-2-kinase/fructose-2,6-bisphosphatase 1 | 0.59                   | 0.58                   | 0.58                    | 0.45                    | 0.77                                             |
| <i>Pfkfb2</i> | 6-phosphofructo-2-kinase/fructose-2,6-bisphosphatase 2 | 0.15                   | 0.14                   | 0.13                    | 0.13                    | 0.97                                             |
| <i>Pfkfb3</i> | 6-phosphofructo-2-kinase/fructose-2,6-bisphosphatase 3 | 0.98                   | 1.09                   | 0.94                    | 1.11                    | 1.18                                             |
| <i>Pfkfb4</i> | 6-phosphofructo-2-kinase/fructose-2,6-bisphosphatase 4 | 1.87                   | 1.97                   | 2.11                    | 1.91                    | 0.91                                             |
| <i>Aldoa</i>  | Aldolase A                                             | 96.94                  | 97.41                  | 106.91                  | 112.99                  | 1.06                                             |
| <i>Aldob</i>  | Aldolase B                                             | ND                     | ND                     | ND                      | ND                      | ND                                               |
| <i>Aldoc</i>  | Aldolase C                                             | 0.38                   | 0.40                   | 0.42                    | 0.58                    | 1.38                                             |
| <i>Tpi1</i>   | Triosephosphate Isomerase 1                            | 29.91                  | 31.75                  | 32.05                   | 34.35                   | 1.07                                             |
| <i>Gapdh</i>  | Glyceraldehyde 3-phosphate dehydrogenase               | 102.74                 | 110.52                 | 109.72                  | 106.62                  | 0.97                                             |
| <i>Pgk1</i>   | Phosphoglycerate kinase 1                              | 43.40                  | 42.99                  | 42.56                   | 46.64                   | 1.10                                             |
| <i>Pgk2</i>   | Phosphoglycerate kinase 2                              | 0.02                   | 0.02                   | 0.02                    | 0.02                    | 1.04                                             |
| <i>Pgam1</i>  | Phosphoglycerate mutase 1                              | 57.52                  | 58.11                  | 59.24                   | 60.45                   | 1.02                                             |
| <i>Pgam2</i>  | Phosphoglycerate mutase 2                              | 0.05                   | 0.04                   | 0.04                    | 0.05                    | 1.04                                             |
| <i>Pgam5</i>  | Phosphoglycerate mutase 5                              | 8.77                   | 8.89                   | 9.06                    | 10.53                   | 1.16                                             |
| <i>Eno1</i>   | Enolase 1                                              | 61.53                  | 62.80                  | 62.73                   | 62.85                   | 1.00                                             |
| <i>Eno1b</i>  | Enolase 1b                                             | 58.90                  | 59.31                  | 62.26                   | 60.43                   | 0.97                                             |
| <i>Eno2</i>   | Enolase 2                                              | 1.66                   | 1.70                   | 1.49                    | 1.70                    | 1.14                                             |
| <i>Eno3</i>   | Enolase 3                                              | 3.05                   | 3.34                   | 3.31                    | 3.63                    | 1.10                                             |
| <i>Eno4</i>   | Enolase 4                                              | 0.03                   | 0.02                   | 0.03                    | 0.03                    | 1.04                                             |
| <i>Pklr</i>   | Pyruvate kinase isotype L/R                            | 0.03                   | 0.02                   | 0.02                    | 0.02                    | 1.03                                             |
| <i>Pkm</i>    | Pyruvate kinase                                        | 31.59                  | 32.83                  | 34.37                   | 34.67                   | 1.01                                             |

**Table S3**

[Table S3] DNA microarray analysis; the relative expression of genes encoding enzymes of collateral glucose-utilising pathways in IMS32 cells at 1 h in the [Glc 5 mM/Pyr (+)], [Glc 5 mM/Pyr (-)], [Glc 15 mM/Pyr (+)] and [Glc 15 mM/Pyr (-)].

| Gene          | Protein                                                  | 5 mM glucose<br>pyruvate+ | 5 mM glucose<br>pyruvate- | 15 mM glucose<br>pyruvate+ | 15 mM glucose<br>pyruvate- | 15 mM glucose pyruvate-<br>/15 mM glucose pyruvate+ |
|---------------|----------------------------------------------------------|---------------------------|---------------------------|----------------------------|----------------------------|-----------------------------------------------------|
| <i>Tkt</i>    | Transketolase                                            | 32.49                     | 33.64                     | 34.86                      | 32.96                      | 0.95                                                |
| <i>Gfpt1</i>  | Glutamine-fructose-6-<br>phosphate<br>aminotransferase 1 | 2.91                      | 2.80                      | 2.73                       | 2.48                       | 0.91                                                |
| <i>Gfpt2</i>  | Glutamine-fructose-6-<br>phosphate<br>aminotransferase 2 | 0.06                      | 0.07                      | 0.07                       | 0.08                       | 1.09                                                |
| <i>Akr1b3</i> | Aldose reductase                                         | 24.42                     | 24.82                     | 25.73                      | 27.06                      | 1.05                                                |
| <i>Sord</i>   | Sorbitol dehydrogenase                                   | 4.84                      | 5.25                      | 5.28                       | 5.77                       | 1.09                                                |

**Table S4**

[Table S4] DNA microarray analysis; the relative expression of genes encoding enzymes of TCA cycle in IMS32 cells at 1 h in the [Glc 5 mM/Pyr (+)], [Glc 5 mM/Pyr (-)], [Glc 15 mM/Pyr (+)] and [Glc 15 mM/Pyr (-)].

| Gene          | Protein                                                               | 5 mM glucose<br>pyruvate+ | 5 mM glucose<br>pyruvate- | 15 mM glucose<br>pyruvate+ | 15 mM glucose<br>pyruvate- | 15 mM glucose pyruvate-<br>/15 mM glucose pyruvate+ |
|---------------|-----------------------------------------------------------------------|---------------------------|---------------------------|----------------------------|----------------------------|-----------------------------------------------------|
| <i>Cs</i>     | Citrate synthase                                                      | 54.22                     | 54.28                     | 56.97                      | 53.79                      | 0.94                                                |
| <i>Aco1</i>   | Aconitase 1                                                           | 0.07                      | 0.08                      | 0.06                       | 0.07                       | 1.08                                                |
| <i>Aco2</i>   | Aconitase 2                                                           | 12.19                     | 12.30                     | 12.85                      | 12.19                      | 0.95                                                |
| <i>Idh1</i>   | Isocitrate dehydrogenase<br>(NADP(+)) 1                               | 0.33                      | 0.38                      | 0.37                       | 0.42                       | 1.14                                                |
| <i>Idh2</i>   | Isocitrate dehydrogenase<br>(NADP(+)) 2                               | 29.15                     | 29.20                     | 31.37                      | 31.34                      | 1.00                                                |
| <i>Idh3a</i>  | Isocitrate Dehydrogenase<br>(NAD(+)) 3 Catalytic<br>Subunit Alpha     | 9.32                      | 8.60                      | 8.81                       | 9.63                       | 1.09                                                |
| <i>Idh3b</i>  | Isocitrate Dehydrogenase<br>(NAD(+)) 3 Non-Catalytic<br>Subunit Beta  | 4.35                      | 4.29                      | 4.53                       | 4.74                       | 1.05                                                |
| <i>Idh3g</i>  | Isocitrate Dehydrogenase<br>(NAD(+)) 3 Non-Catalytic<br>Subunit Gamma | 19.99                     | 19.00                     | 19.79                      | 22.13                      | 1.12                                                |
| <i>Ogdh</i>   | Oxoglutarate dehydrogenase                                            | 9.65                      | 10.01                     | 9.72                       | 8.85                       | 0.91                                                |
| <i>Sucla2</i> | Succinate-CoA Ligase<br>ADP-Forming Subunit Beta                      | 4.34                      | 4.17                      | 4.40                       | 4.72                       | 1.07                                                |
| <i>Suclg1</i> | Succinate-CoA Ligase<br>GDP/ADP-Forming Subunit<br>Alpha              | 6.49                      | 6.28                      | 6.77                       | 7.18                       | 1.06                                                |
| <i>Suclg2</i> | Succinate-CoA Ligase<br>GDP-Forming Subunit Beta                      | 0.73                      | 0.63                      | 0.68                       | 0.67                       | 0.99                                                |
| <i>Sdha</i>   | Succinate Dehydrogenase<br>Complex Flavoprotein<br>Subunit A          | 9.12                      | 8.99                      | 9.35                       | 9.48                       | 1.01                                                |
| <i>Sdhb</i>   | Succinate Dehydrogenase<br>Complex Iron Sulfur<br>Subunit B           | 33.92                     | 34.23                     | 37.53                      | 38.31                      | 1.02                                                |
| <i>Sdhc</i>   | Succinate Dehydrogenase<br>Complex Subunit C                          | 9.48                      | 9.58                      | 9.84                       | 10.61                      | 1.08                                                |
| <i>Sdhd</i>   | Succinate Dehydrogenase<br>Complex Subunit D                          | 17.21                     | 16.31                     | 18.79                      | 20.84                      | 1.11                                                |
| <i>Fh1</i>    | Fumarate hydratase 1                                                  | 12.58                     | 12.35                     | 13.68                      | 13.47                      | 0.98                                                |
| <i>Mdh1</i>   | Malate Dehydrogenase 1                                                | 17.24                     | 17.58                     | 19.12                      | 19.77                      | 1.03                                                |
| <i>Mdh1b</i>  | Malate Dehydrogenase 1B                                               | 0.13                      | 0.14                      | 0.15                       | 0.16                       | 1.05                                                |
| <i>Mdh2</i>   | Malate Dehydrogenase 2                                                | 77.00                     | 81.56                     | 86.56                      | 87.10                      | 1.01                                                |

**Fig. S1**

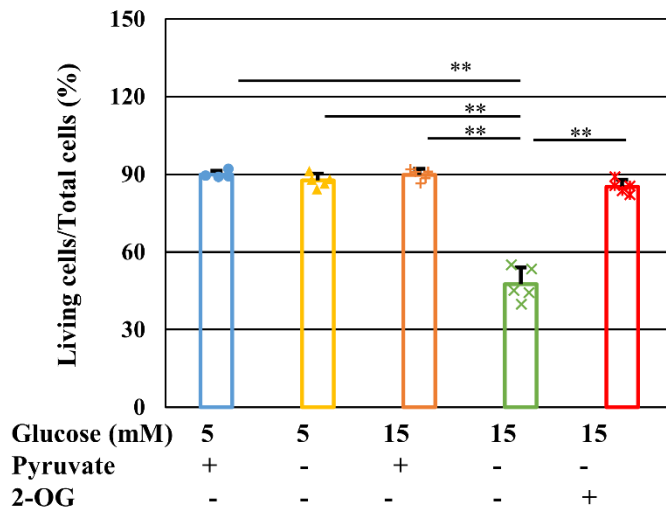

**[Figure S1] 2-OG prevents DRG neuronal death under high-glucose pyruvate-starved conditions**

Cell viability at 6 h in the [Glc 5 mM/Pyr (+)] (**blue**), [Glc 5 mM/Pyr (-)] (**yellow**), [Glc 15 mM/Pyr (+)] (**brown**), [Glc 15 mM/Pyr (-)] (**green**), and [Glc 15 mM/Pyr (-)/2-OG (+)] (**red**) groups was determined by trypan blue staining. Data represent mean + SD from 4-5 values from independent culture (individual values are depicted as circles, triangles, pluses, crosses and asterisks). Statistical analysis of the data was performed by one-way ANOVA followed by post hoc comparisons with Tukey HSD test. \*\*  $P < 0.01$ .

**Fig. S2**

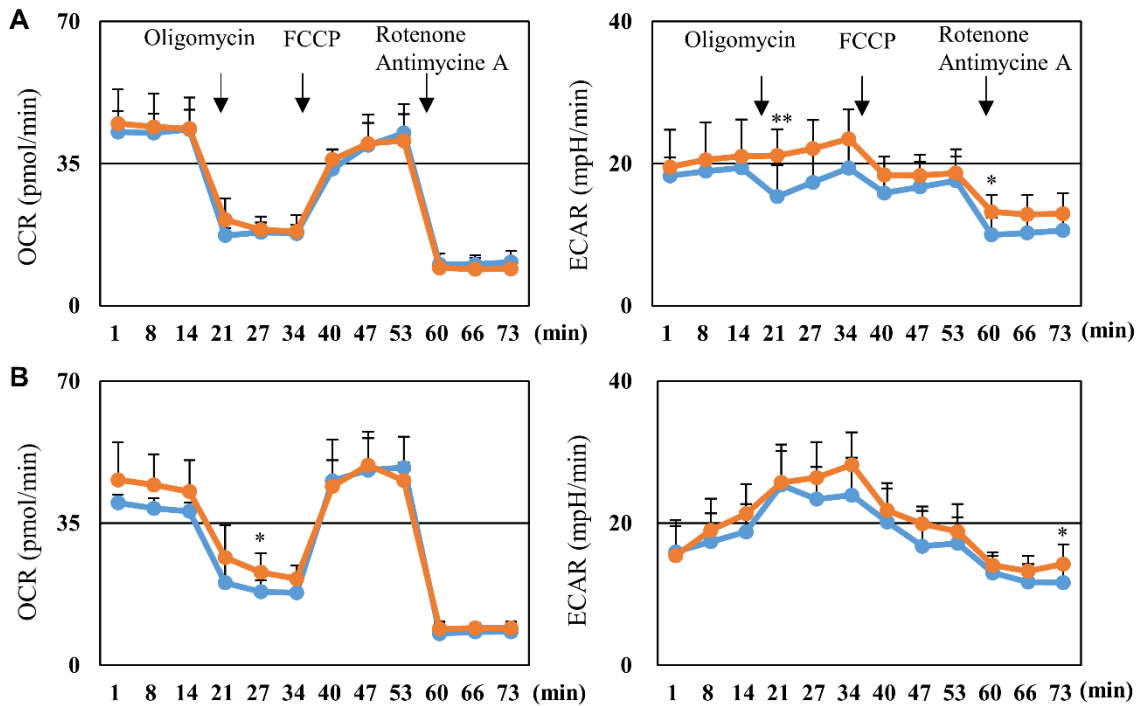

**[Figure S2] The effects of 2-OG supplementation on OCR and ECAR under normal- and high-glucose conditions in the presence of pyruvate**

Time courses of OCR (**left**) and ECAR (**right**) in the [Glc 5 mM/Pyr (+)/2-OG(-)] (A, blue), [Glc 5 mM/Pyr(+)/2-OG(+)] (A, orange), [Glc 100 mM/Pyr (+)/2-OG(-)] (B, blue), and [Glc 100 mM/Pyr (+)/2-OG(+)](B, orange) groups measured by Extracellular Flux Analyzer. Data represent mean + SD from 9-10 values from two independent cultures. Statistical analysis of the data was performed Mann-Whitney test. \*  $P < 0.05$ , \*\*  $P < 0.01$ .

**Fig. S3**

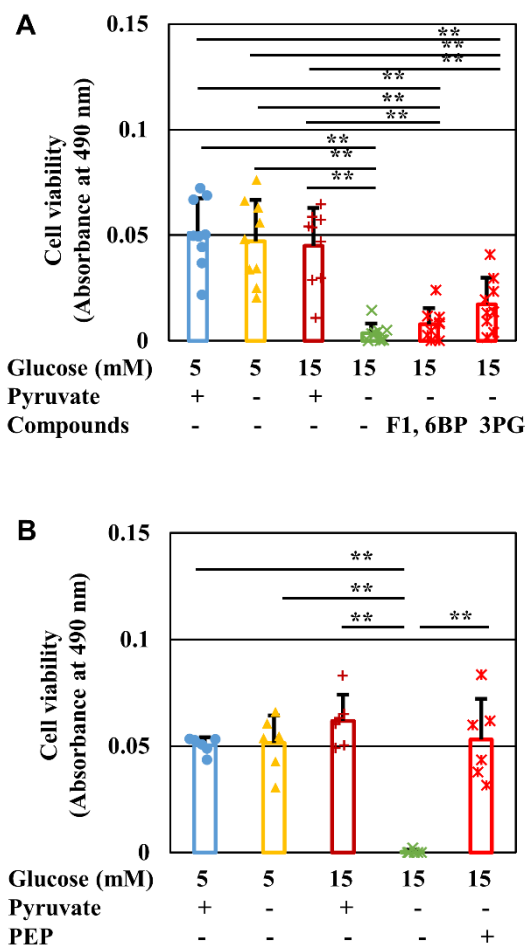

**[Figure S3] 3PG and PEP, but not F1,6BP, prevents IMS32 cell death under high-glucose pyruvate-starved conditions**

Cell viability at 24 h in the [Glc 5 mM/Pyr (+)] (**blue**), [Glc 5 mM/Pyr (-)] (**yellow**), [Glc 15 mM/Pyr (+)] (**brown**), [Glc 15 mM/Pyr (-)] (**green**), and [Glc 15 mM/Pyr (-)] supplemented with (**A**) F1,6BP, 3-phosphoglyceric acid (3-PG) or (**B**) phosphoenolpyruvate (PEP) (**red**) groups was determined by MTS assay. Data represent mean + SD from six (**A**) and nine (**B**) values from two or three independent cultures (individual values are depicted as circles, triangles, pluses, crosses and asterisks). \*\*  $P < 0.01$ .



**Fig. S4**

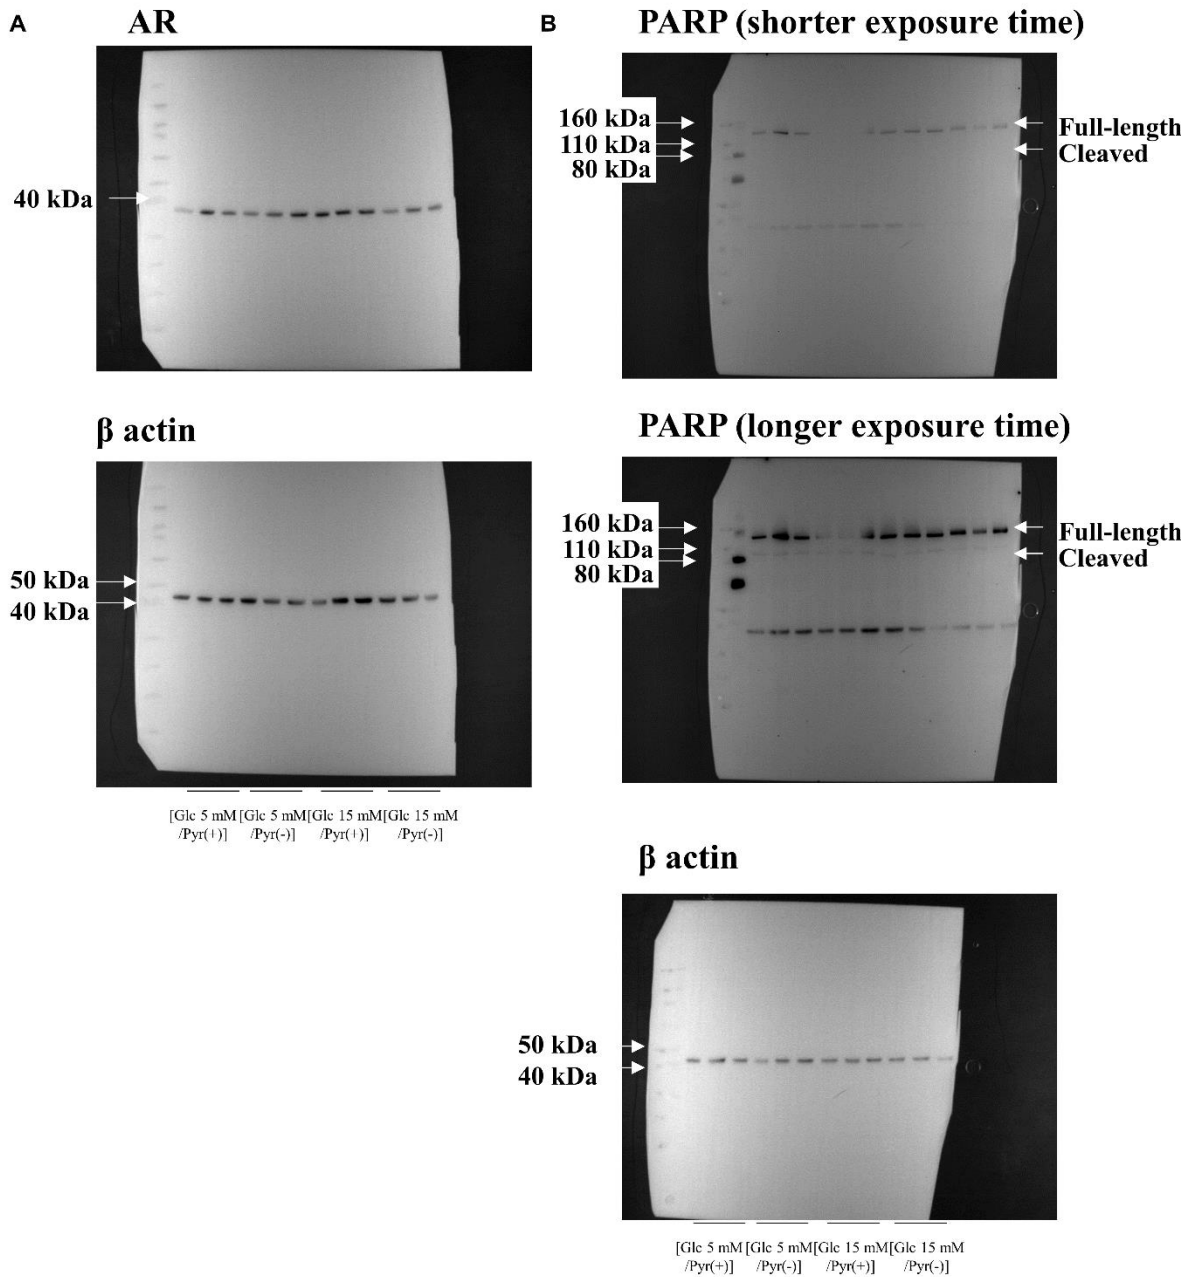

**[Figure S4] Actual Western blot pictures of AR and  $\beta$  actin (A), and PARP (full-length and cleaved) and  $\beta$  actin (B).**

Full length of the membranes presented in Fig. 6C (A) and Fig. 8A (B). AR and  $\beta$  actin (A), and PARP in shorter and longer exposure time and  $\beta$  actin (B) were sequentially visualized in same membranes.

Fig. S5

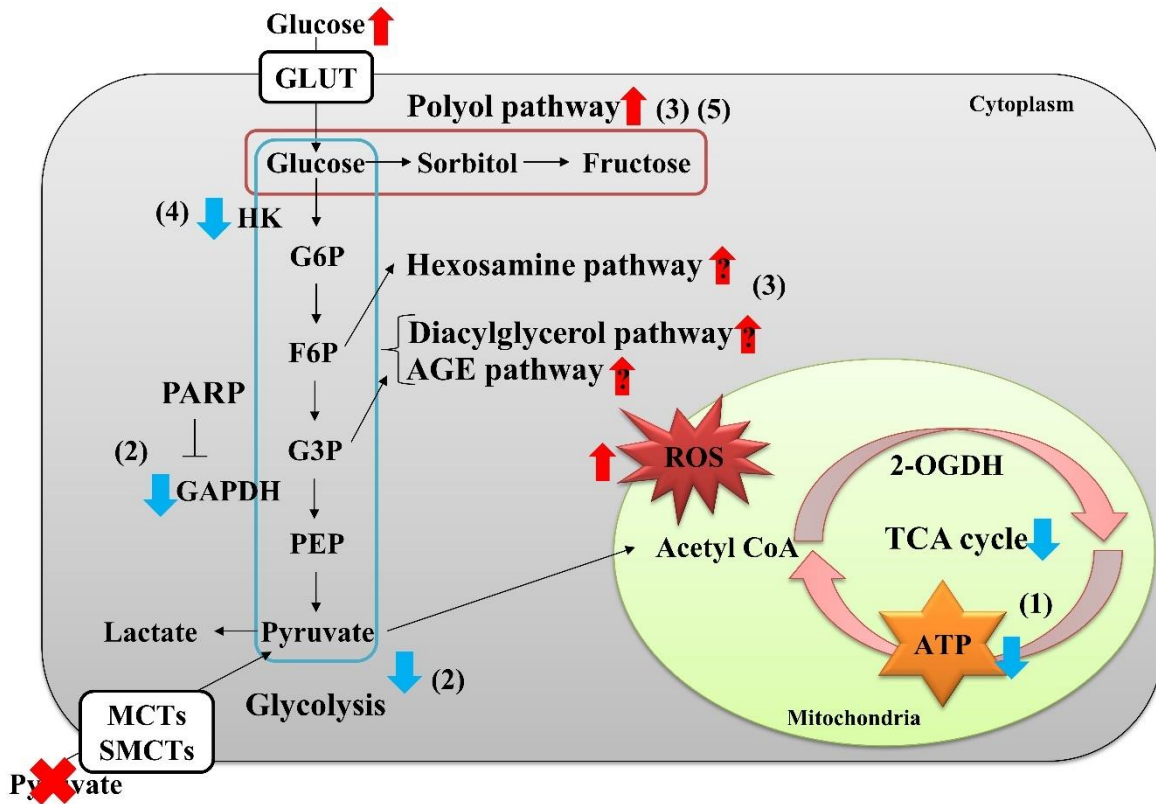

[Figure S5] The schematic representation of sequential metabolic change in IMS32 cells under high-glucose pyruvate-starved conditions.

Rapid IMS32 cell death under high-glucose pyruvate-starved conditions can be caused by the sequential metabolic changes as follows; 1) reduced TCA cycle intermediates and mitochondrial ATP production, 2) impaired GAPDH activity and inhibition of glycolytic flux, 3) augmentation of the polyol and other collateral glycolysis pathways, 4) decreased hexokinase (HK) activity and glucose utilization in the glycolytic pathway, and 5) further enhancement of the polyol pathway flux. The schematic image was created by H. Y.
